# Supplementary material for: Using Geostationary-Derived Sub-Daily FRP Variability vs. Prescribed Diurnal Cycles: Impact of African Fires on Tropospheric Ozone
Source: Copernicus journal article supplement (doi:10.5194/egusphere-2025-2594), 2025-07-03
Supplement: Supplementary file 1 [file egusphere-2025-2594-supplement.pdf]

1 Supporting Information for

2  
3 **Using Geostationary-Derived Sub-Daily FRP Variability vs.**  
4 **Prescribed Diurnal Cycles: Impact of African Fires on**  
5 **Tropospheric Ozone**  
6

7 Haolin Wang<sup>1,2</sup>, William Maslanka<sup>3,4,5</sup>, Paul I. Palmer<sup>2,6\*</sup>, Martin J. Wooster<sup>3,4,5</sup>, Haofan  
8 Wang<sup>1</sup>, Fei Yao<sup>2,6</sup>, Liang Feng<sup>2,6</sup>, Kai Wu<sup>7</sup>, Xiao Lu<sup>1\*</sup>, Shaojia Fan<sup>1\*</sup>  
9

10 <sup>1</sup> School of Atmospheric Sciences, Sun Yat-sen University, and Southern Marine Science  
11 and Engineering Guangdong Laboratory (Zhuhai), Zhuhai, China

12 <sup>2</sup> School of GeoSciences, University of Edinburgh, Edinburgh, UK

13 <sup>3</sup> Department of Geography, King's College London, London, UK

14 <sup>4</sup> National Centre for Earth Observation, King's College London, London, UK

15 <sup>5</sup> Leverhulme Centre for Wildfires, Environment and Society, King's College London,  
16 London, UK

17 <sup>6</sup> National Centre for Earth Observation, University of Edinburgh, Edinburgh, UK

18 <sup>7</sup> Department of Civil and Environmental Engineering, University of California, Irvine,  
19 CA, USA

20  
21 \*To whom correspondence should be addressed.

22 Email: [pip@ed.ac.uk](mailto:pip@ed.ac.uk) (Paul I. Palmer), [luxiao25@mail.sysu.edu.cn](mailto:luxiao25@mail.sysu.edu.cn) (Xiao Lu), and  
23 [eesfsj@mail.sysu.edu.cn](mailto:eesfsj@mail.sysu.edu.cn) (Shaojia Fan)  
24

25 **This PDF file includes:**

26 Supporting Table S1 and Figs. S1 to S10

27 **Table S1.** Spatial correlation and mean bias (in the brackets) between observations and  
 28 simulations (unit: DU for CO and O<sub>3</sub>, and 10<sup>16</sup> molecules cm<sup>-2</sup> for NO<sub>2</sub>).

|                           | Month | GFED4_3hourly | GFAS_daily     | FREM_hourly   | FREM_3hourly  | FREM_daily    |
|---------------------------|-------|---------------|----------------|---------------|---------------|---------------|
| CO                        | Jan   | 0.91 (1.47)   | 0.89 (0.13)    | 0.90 (2.10)   | 0.90 (2.11)   | 0.90 (2.11)   |
|                           | Apr   | 0.92 (-3.92)  | 0.92 (-3.41)   | 0.92 (-3.86)  | 0.92 (-3.87)  | 0.92 (-3.89)  |
|                           | Jul   | 0.95 (5.97)   | 0.90 (1.56)    | 0.94 (6.41)   | 0.94 (6.32)   | 0.93 (6.25)   |
|                           | Oct   | 0.58 (5.42)   | 0.52 (5.34)    | 0.49 (4.82)   | 0.49 (4.81)   | 0.49 (4.82)   |
| NO <sub>2</sub>           | Jan   | 0.79 (0.04)   | 0.82 (0.01)    | 0.81 (0.02)   | 0.81 (0.02)   | 0.79 (0.03)   |
|                           | Apr   | 0.84 (0.01)   | 0.84 (0.01)    | 0.83 (0.01)   | 0.83 (0.01)   | 0.83 (0.01)   |
|                           | Jul   | 0.87 (0.08)   | 0.90 (0.02)    | 0.89 (0.06)   | 0.90 (0.05)   | 0.89 (0.05)   |
|                           | Oct   | 0.78 (0.01)   | 0.82 (-0.0004) | 0.84 (-0.002) | 0.84 (-0.003) | 0.83 (-0.002) |
| TROPOMI<br>O <sub>3</sub> | Jan   | 0.54 (-1.05)  | 0.62 (-2.84)   | 0.60 (-0.50)  | 0.60 (-0.50)  | 0.60 (-0.53)  |
|                           | Apr   | -0.28 (-4.33) | -0.28 (-4.55)  | -0.29 (-1.59) | -0.29 (-1.58) | -0.29 (-1.58) |
|                           | Jul   | -0.03 (1.71)  | -0.10 (-0.59)  | -0.07 (0.04)  | -0.07 (0.06)  | -0.06 (0.04)  |
|                           | Oct   | 0.80 (-2.44)  | 0.77 (-3.01)   | 0.78 (-1.84)  | 0.78 (-1.84)  | 0.78 (-1.86)  |
| OMI<br>O <sub>3</sub>     | Jan   | 0.77 (9.17)   | 0.81 (7.92)    | 0.80 (8.13)   | 0.80 (8.15)   | 0.80 (8.15)   |
|                           | Apr   | 0.87 (3.10)   | 0.88 (2.93)    | 0.87 (2.89)   | 0.87 (2.90)   | 0.87 (2.89)   |
|                           | Jul   | 0.72 (4.14)   | 0.85 (2.81)    | 0.84 (3.02)   | 0.83 (3.03)   | 0.83 (3.03)   |
|                           | Oct   | 0.92 (2.26)   | 0.93 (1.86)    | 0.94 (1.78)   | 0.94 (1.79)   | 0.94 (1.78)   |

# Ozone: GEOS-Chem vs. TROPOMI

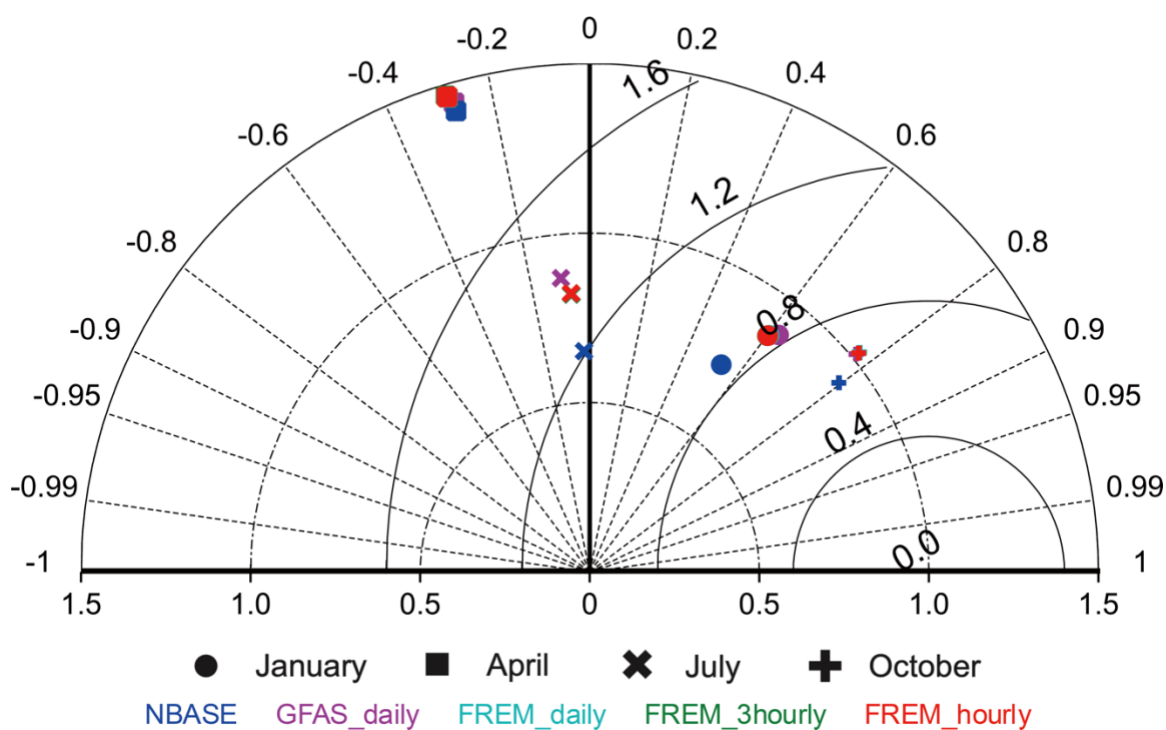

30

31

**Figure S1.** Same with Figure 2, but for TROPOMI tropospheric ozone column.

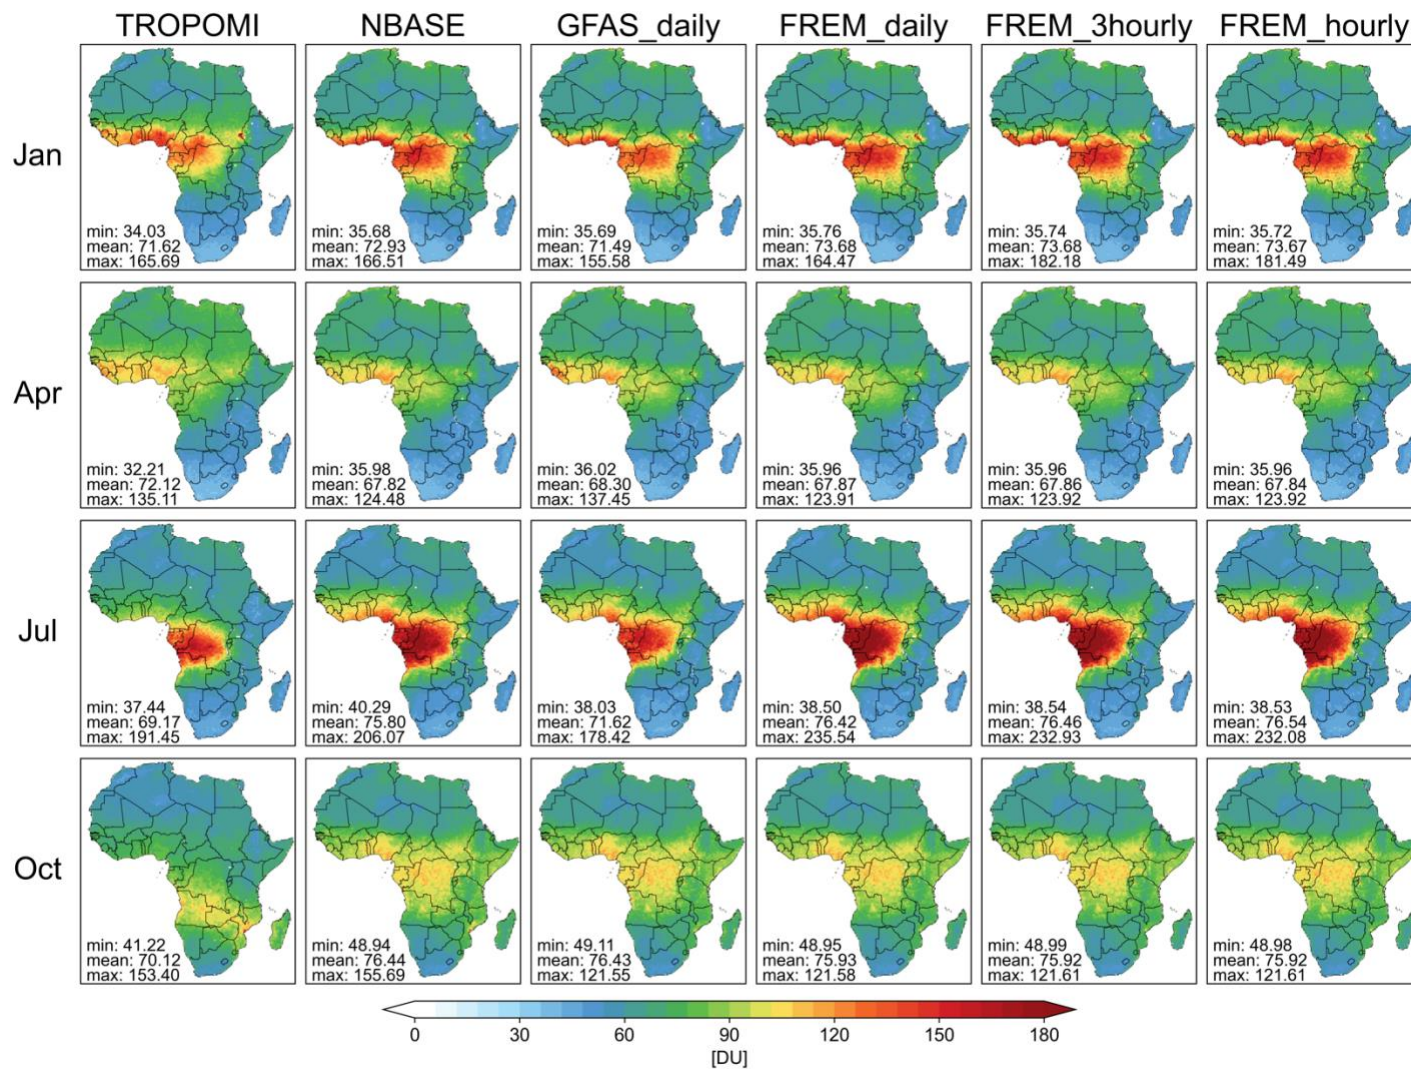

32

33 **Figure S2.** Comparison of TROPOMI CO total column with modelled results with different biomass burning emission inventories.

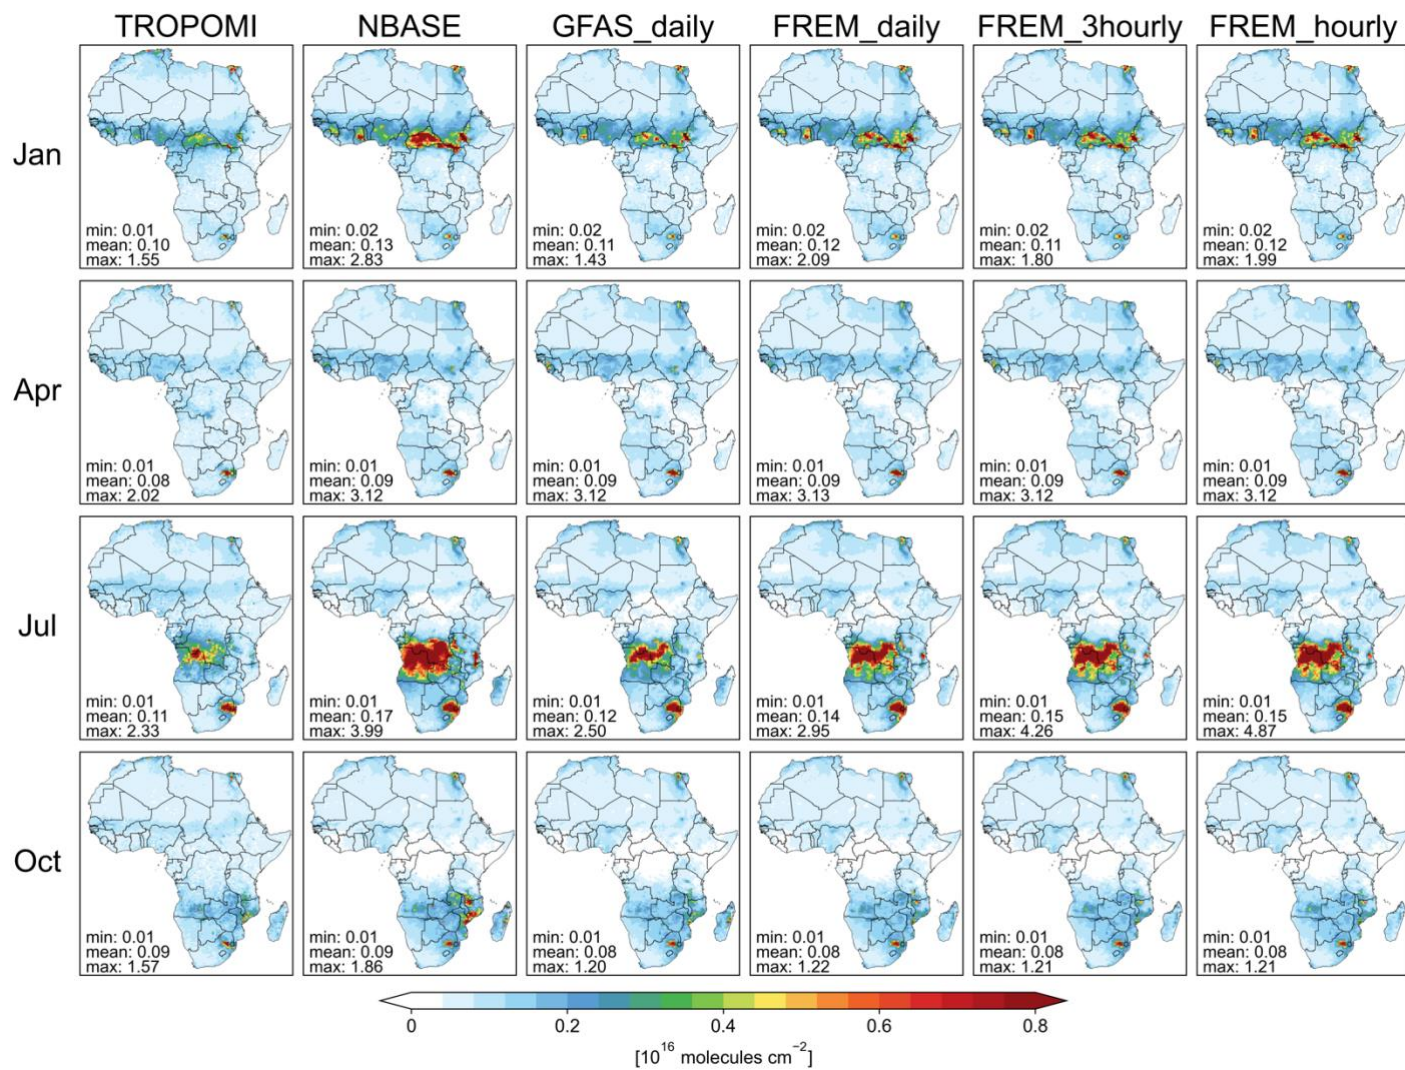

34

35 **Figure S3.** Same with Figure S2, but for tropospheric NO<sub>2</sub> column.

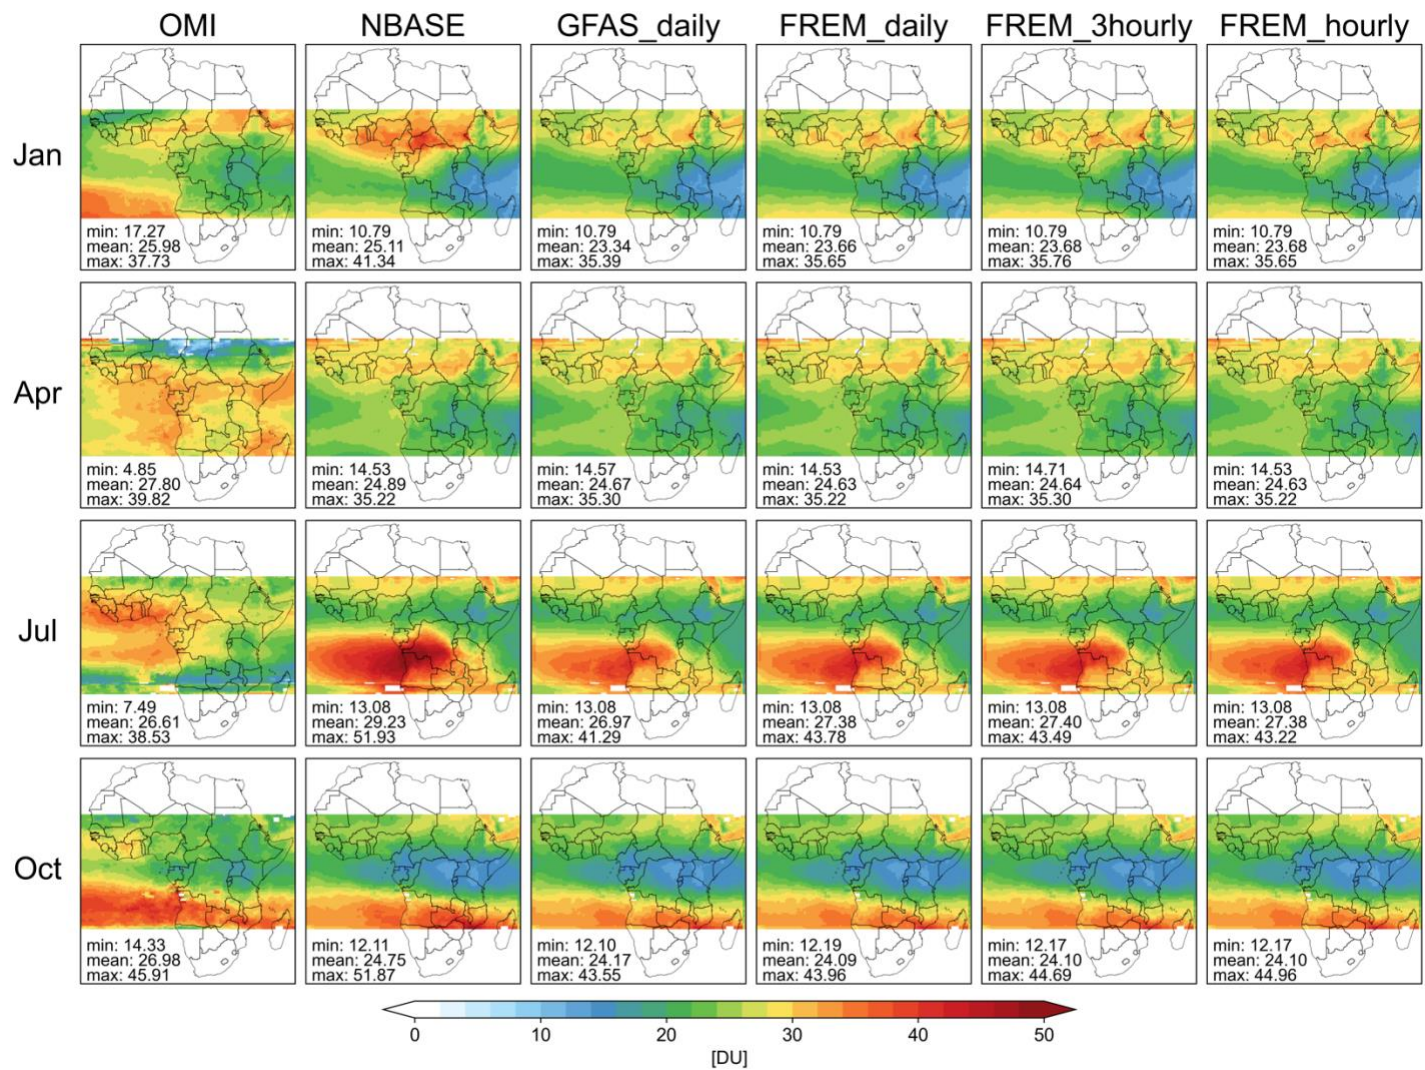

36

37 **Figure S4.** Same with Figure S2, but for TROPOMI tropospheric ozone column.

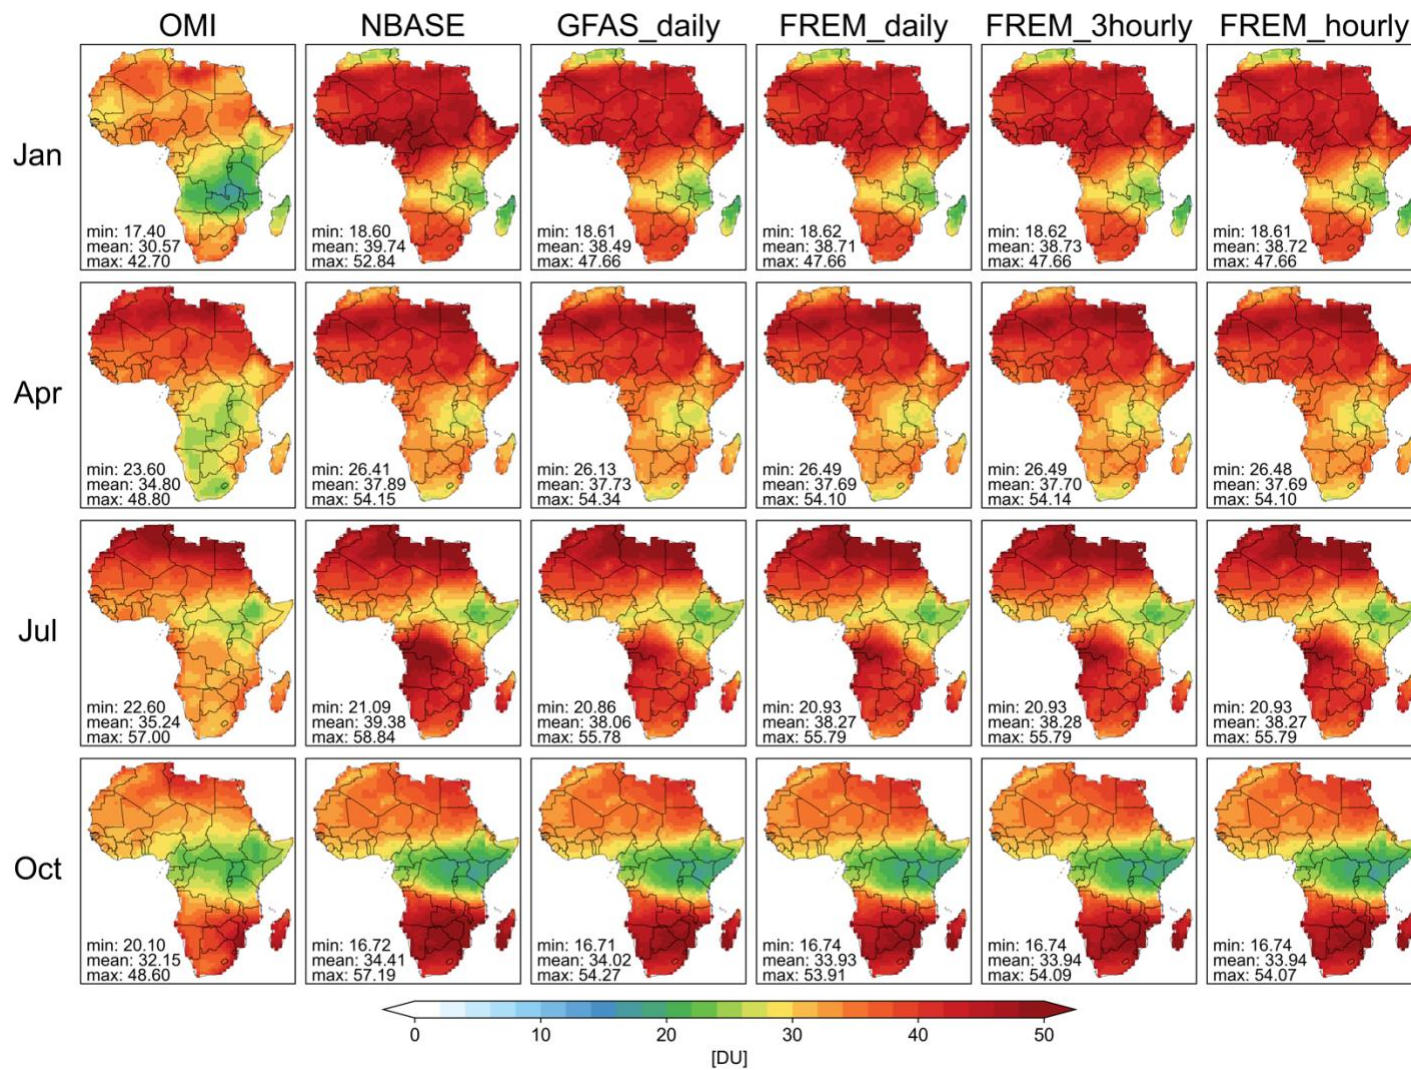

38

39 **Figure S5.** Same with Figure S4, but for OMI tropospheric ozone column.

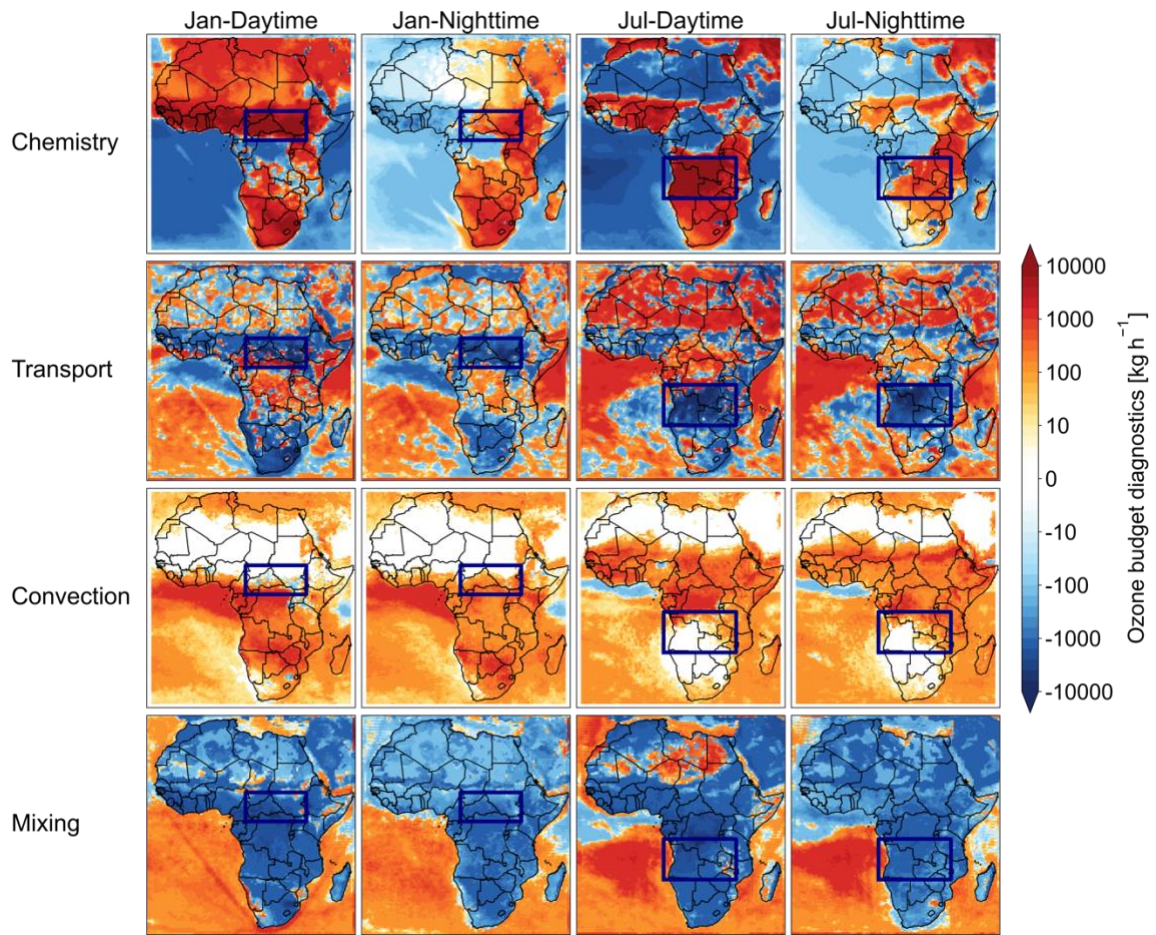

40

41 **Figure S6.** Ozone budget diagnostics ( $\text{kg h}^{-1}$ ) in Africa for January and July 2019 from  
 42 `FREM_hourly`, as estimated by the GEOS-Chem model. The diagnostics include  
 43 contributions from chemistry, transport, convection, and mixing, with results shown  
 44 separately for daytime and nighttime in each month.

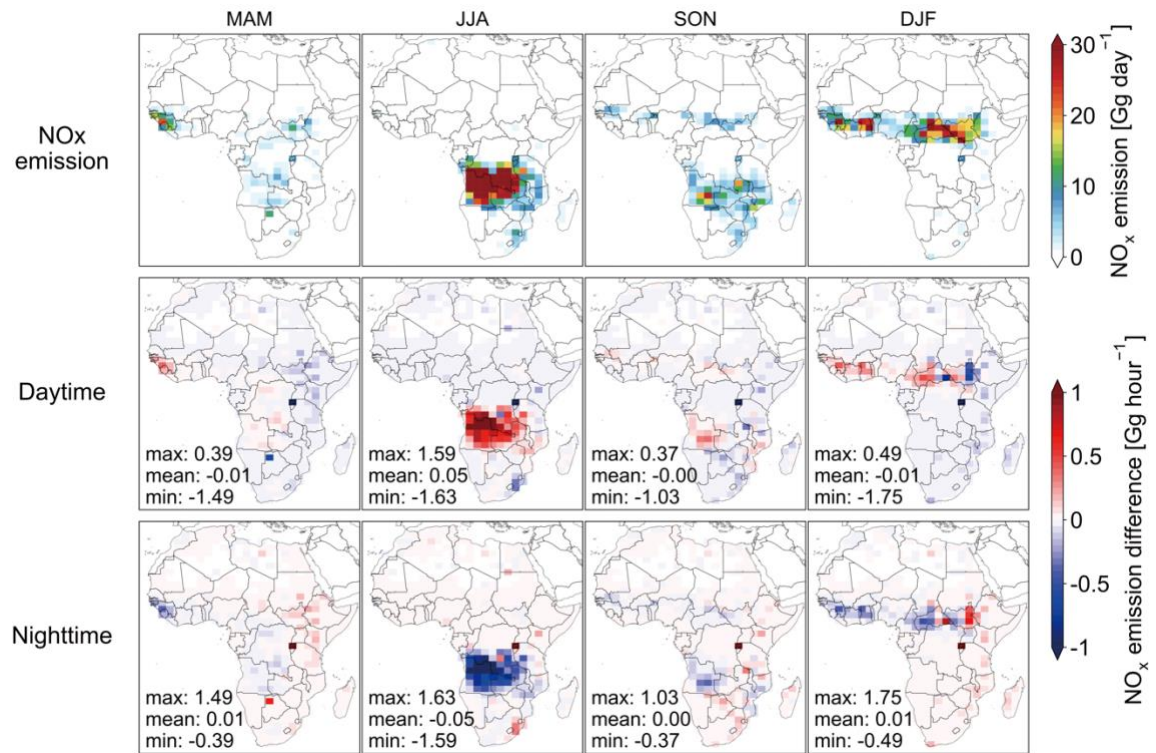

45

46 **Figure S7.** Spatial distribution of biomass burning  $\text{NO}_x$  emissions and daytime and  
 47 nighttime differences between FREM hourly and FREM daily biomass burning emissions  
 48 for different seasons in 2019.

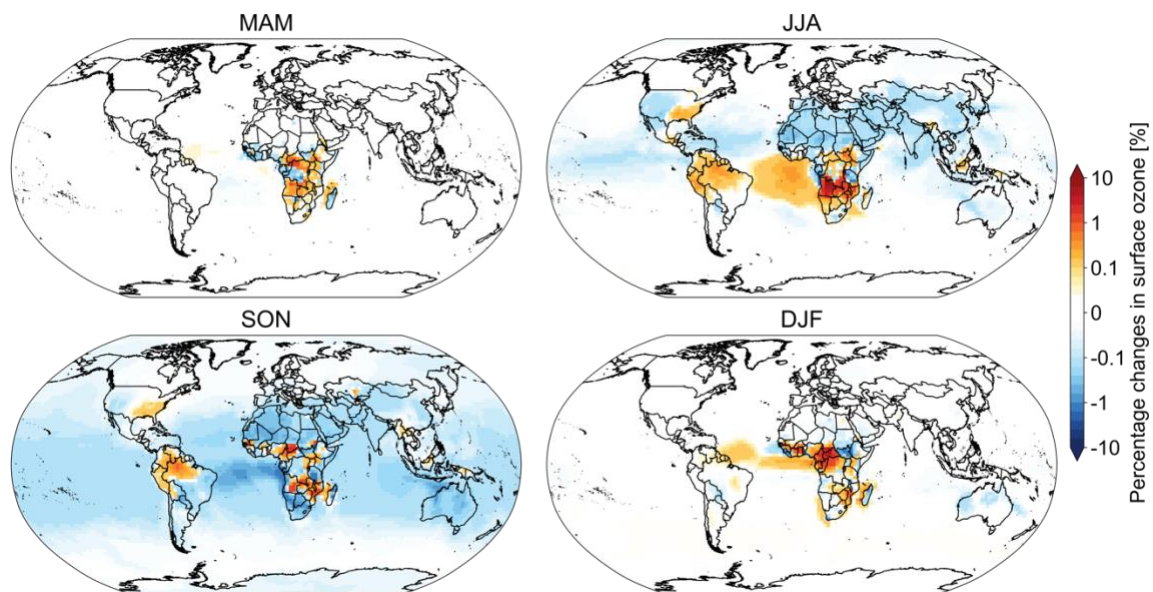

49

50 **Figure S8.** Same as Figure 5, but for the relative change in surface ozone.

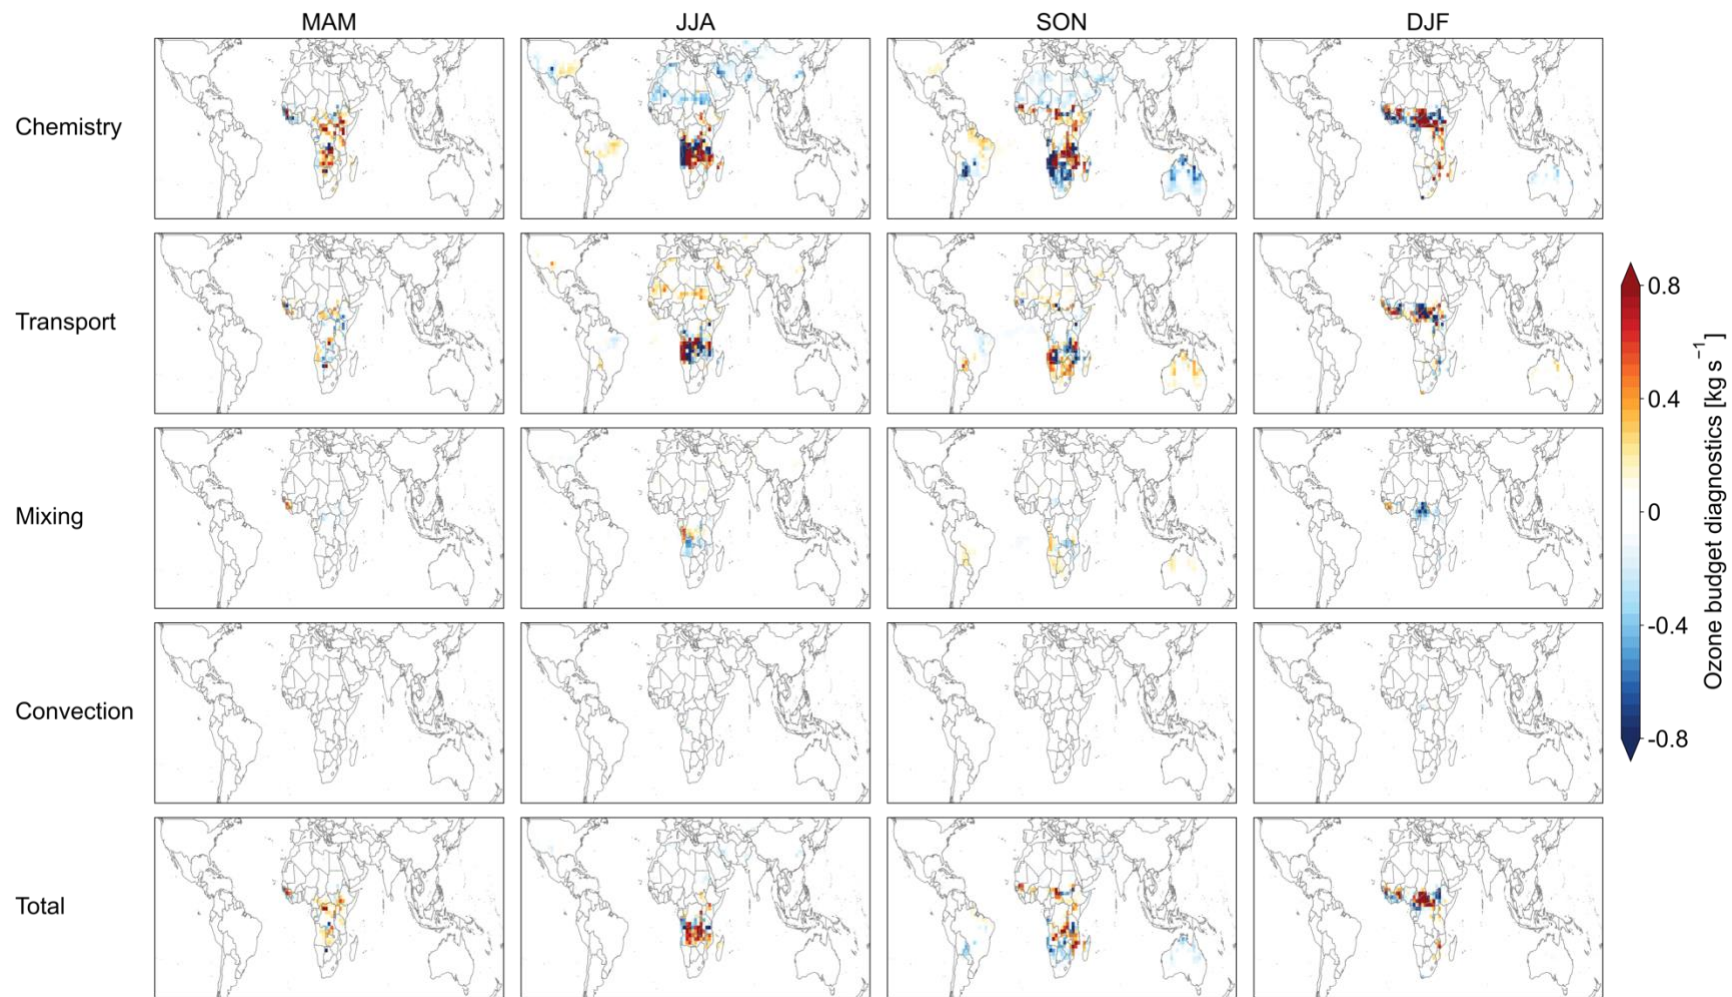

51

52 **Figure S9.** The impact of diurnal variations in African biomass burning emissions on ozone budget diagnostics ( $\text{kg s}^{-1}$ ) across different  
 53 seasons in 2019, estimated using the GEOS-Chem model, includes effects from chemistry, transport, mixing, and convection.

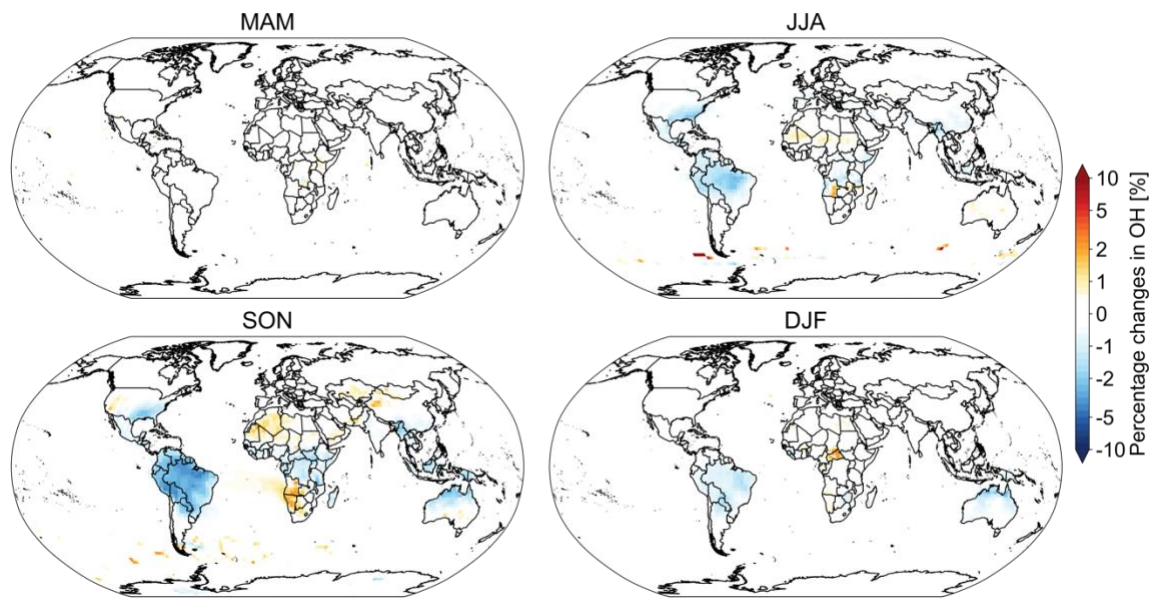

54

55 **Figure S10.** Same as Figure 5, but for the relative change in OH.
